# Supplementary material for: Microenvironment Responsive Modulations in the Fatty Acid Content, Cell Surface Hydrophobicity, and Adhesion of Candida albicans Cells
Source: PubMed Central journal article supplement (PMC6024300; doi:10.3390/jof4020047), 2018-04-06
Supplement: jof-04-00047-s001.pdf [file jof-04-00047-s001.pdf]

Supplementary data

Figure S1. Identification of Fatty acid content in *Candida albicans* cells grown under Temperature at 30°C

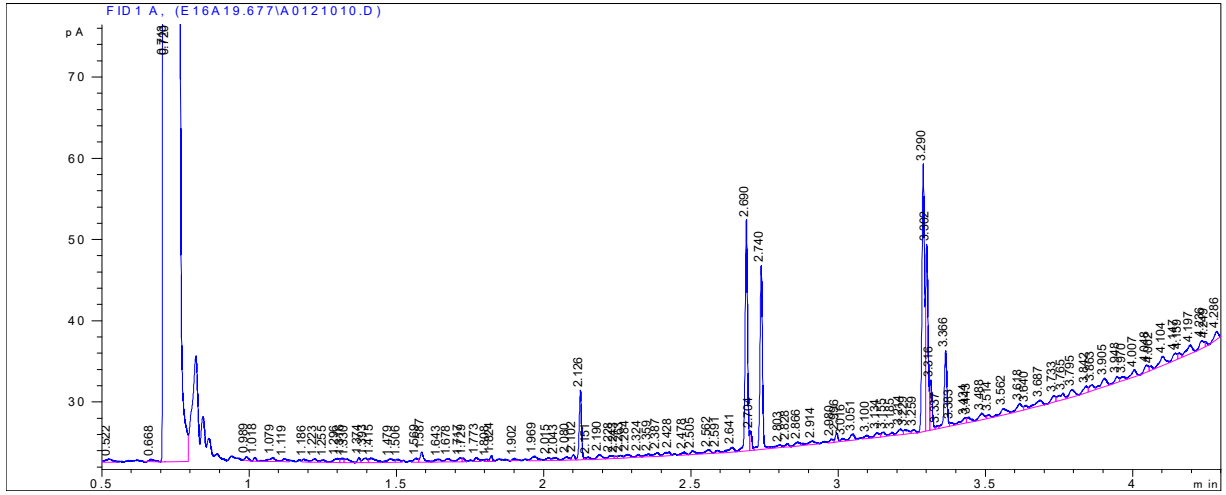

X axis – Retention time

Y axis – Mass

Figure S2. Identification of Fatty acid content in *Candida albicans* cells grown under Temperature at 37°C

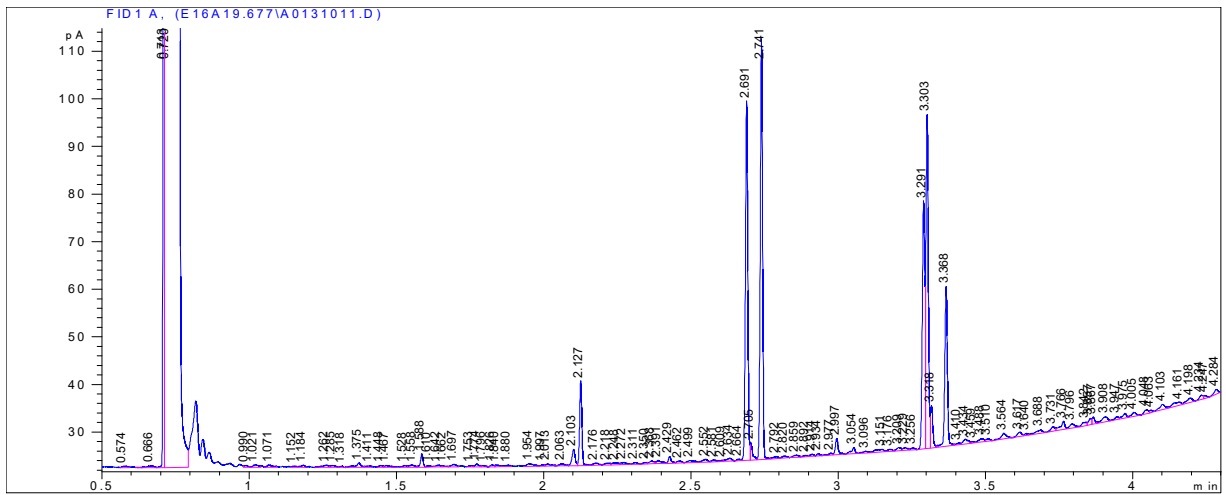

X axis – Retention time

Y axis – Mass

**Figure S3. Identification of Fatty acid content in *Candida albicans* cells grown under pH 7 at 30°C**

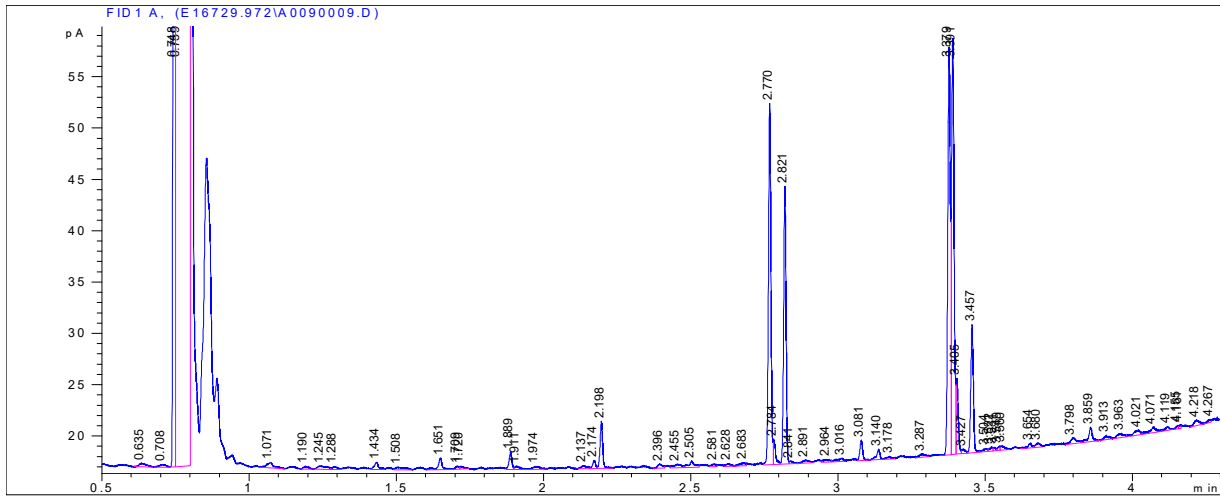

**X axis – Retention time**

**Y axis – Mass**

**Figure S4. Identification of Fatty acid content in *Candida albicans* cells grown under pH 7 at 37°C**

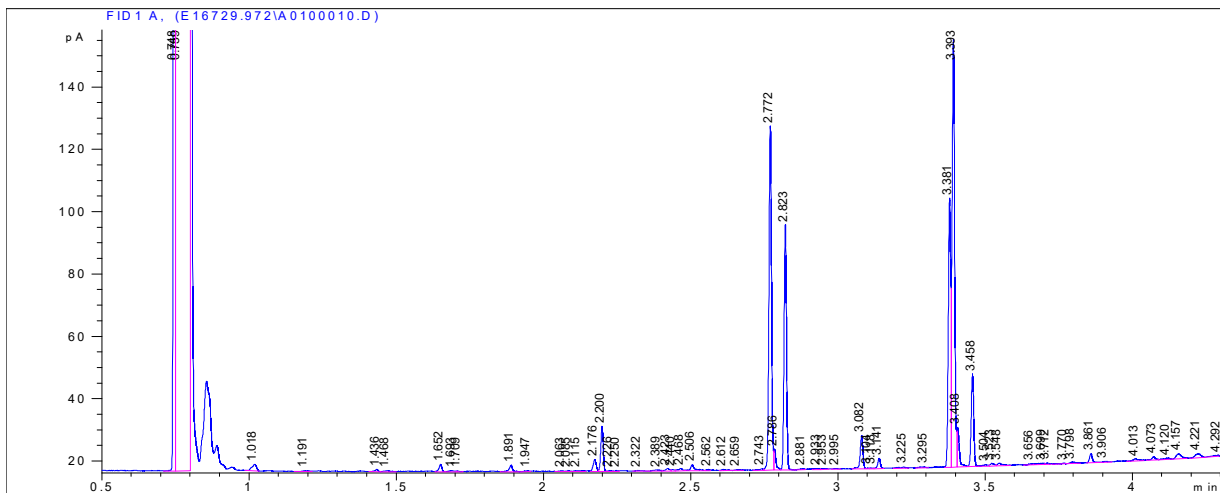

**X axis – Retention time**

**Y axis – Mass**

Figure S5. Identification of Fatty acid content in *Candida albicans* cells grown under LHP (control 100 Pa)

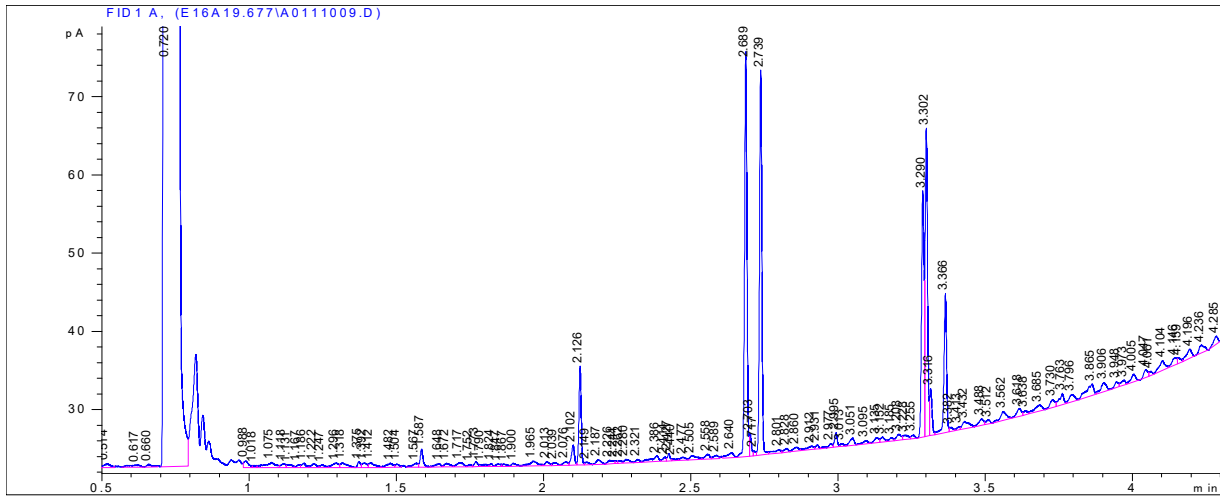

X axis – Retention time

Y axis – Mass

Figure S6. Identification of Fatty acid content in *Candida albicans* cells grown under LHP at 37°C (1800 Pa)

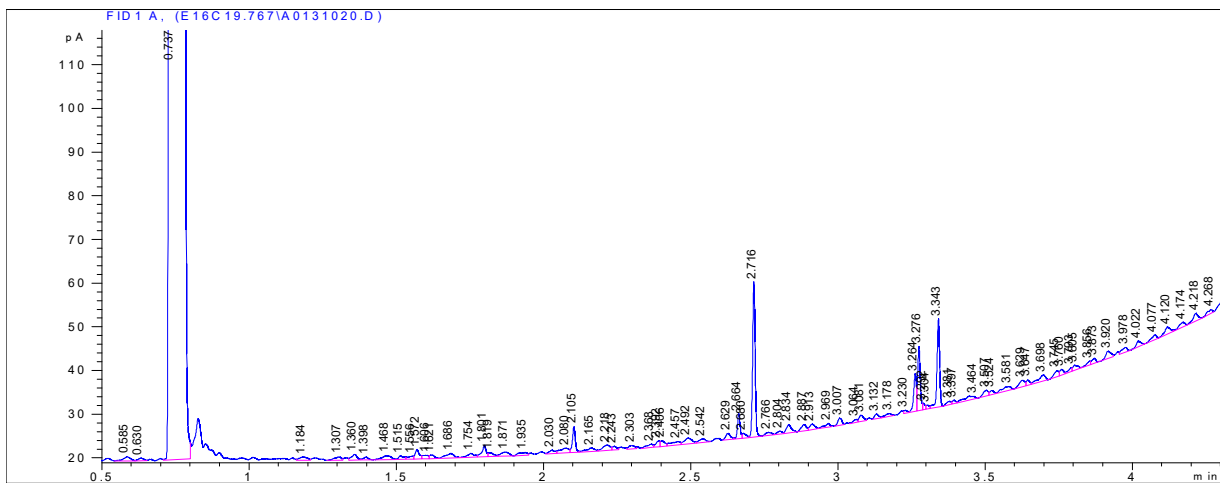

X axis – Retention time

Y axis – Mass

**Table S1. Modulation of fatty acid content in *Candida albicans* cells (ATCC 10231) grown under different environmental condition.**

| Sr. No. | Fatty acid Name                                   | Types of fatty acid                                                         | Fatty acid (%) |       |            |       |                  |       |
|---------|---------------------------------------------------|-----------------------------------------------------------------------------|----------------|-------|------------|-------|------------------|-------|
|         |                                                   |                                                                             | Temperature    |       | Neutral pH |       | LHP at 37°C (Pa) |       |
|         |                                                   |                                                                             | 30°C           | 37°C  | 30°C       | 37°C  | 100              | 1800  |
| 1       | Dodecanoic acid (12:0)                            | Medium chain Saturated                                                      | 0.98           | 0.91  | 1.13       | 0.58  | 1.47             | 2.63  |
| 2       | (9Z)-9-Tetradecenoic acid(14:1 w5c)               | Omega-5 unsaturated                                                         | 0.90           | -     | 0.52       | 0.97  | -                | -     |
| 3       | Tetradecanoic acid(14:0)                          | Long chain Saturated                                                        | 9.47           | 4.74  | 2.74       | 2.81  | 4.46             | 4.63  |
| 4       | 13-Methyltetradecanoic acid(15:0 iso)             | Long chain saturated                                                        | 0.58           | -     | 0.43       | 0.19  | 0.33             | -     |
| 5       | Pentadecanoic acid(15:0)                          | Long chain Saturated                                                        | -              | -     | -          | -     | -                | -     |
| 6       | 2-Hydroxytetradecanoic acid(14:0 2OH)             | Hydroxy saturated                                                           | 1.10           | -     | 0.26       | -     | 0.49             | -     |
| 7       | Hexadecanoic acid(16:0)                           | Long chain Saturated                                                        | 25.23          | 22.23 | 14.20      | 14.82 | 20.40            | 23.32 |
| 8       | Heptadecanoic acid(17:0)                          | Long chain Saturated                                                        | -              | 0.53  | 0.76       | 0.69  | -                | -     |
| 9       | (9Z)-9-Octadecenoic acid(18:1 w9c)                | Monounsaturated                                                             | -              | 18.12 | 22.91      | 26.79 | 20.91            | 9.59  |
| 10      | Octadecanoic acid(18:0)                           | Long chain Saturated                                                        | -              | 9.13  | 6.90       | 5.76  | 12.43            | 13.60 |
| 11      | 17-Methyloctadecanoic acid(19:0 iso)              | Methyl branched Saturated                                                   | -              | 0.68  | 0.40       | 0.10  | 1.55             | -     |
| 12      | 18-Methylnonadecanoic acid(20:0 iso)              | Methyl branched Saturated                                                   | -              | 0.42  | 0.52       | -     | 1.68             | -     |
| 13      | Icosanoic acid(20:0)                              | Long chain saturated                                                        | -              | 0.42  | 0.75       | 0.29  | -                | -     |
| 14      | 2-Hydroxydecanoic acid(10:0 2OH)                  | Short chain Saturated                                                       | -              | 0.22  | -          | 0.20  | -                | 0.90  |
| 15      | 12-Methyltetradecanoic acid(15:0 anteiso)         | Branched fatty acid, methyl branched, saturated fatty acid and derivatives. | -              | 0.14  | -          | 0.26  | -                | -     |
| 16      | Decanoic acid(10:0)                               | Medium chain Saturated                                                      | 0.98           | -     | -          | -     | 0.68             | 1.96  |
| 17      | 9-Methyldecanoic acid(11:0 iso)                   | Methyl branched Saturated                                                   | 1.50           | -     | -          | -     | -                | -     |
| 18      | 8-Methyldecanoic acid(11:0 anteiso)               | Methyl branched Saturated                                                   | 0.87           | 0.13  | -          | -     | -                | 1.59  |
| 19      | 10-Methylundecanoic acid(12:0 iso)                | Methyl Branched Saturated                                                   | 0.89           | -     | -          | -     | 0.55             | -     |
| 20      | 10-Methyldodecanoic acid(13:0 anteiso)            | Methyl Branched Saturated                                                   | 1.04           | 0.29  | -          | -     | 0.90             | 1.77  |
| 21      | 2-Hydroxydodecanoic acid(12:0 2OH)                | long chain hydroxy                                                          | 0.43           | -     | -          | -     | -                | -     |
| 22      | 15:1 iso F                                        | long chain saturated                                                        | 0.64           | -     | -          | -     | -                | -     |
| 23      | 3-Hydroxy-12-Methyltridecanoic acid(14:0 iso 3OH) | Hydroxy saturated                                                           | 0.74           | -     | -          | -     | 0.66             | -     |

|    |                                               |                                           |      |      |      |       |       |      |
|----|-----------------------------------------------|-------------------------------------------|------|------|------|-------|-------|------|
| 24 | (9Z)-9-Hexadecen-1-ol(16:1 w7c alcohol)       | <a href="#">unsaturated fatty alcohol</a> | 1.23 | -    | -    | -     | 0.74  | -    |
| 25 | 14:0 3OH                                      | long chain saturated                      | 0.66 | -    | -    | -     | 0.43  | -    |
| 26 | unknown 15.669                                | ---                                       | -    | -    | -    | -     | -     | -    |
| 27 | (9Z)-9-Hexadecenoic acid (16:1 w7c)           | Omega-7 monounsaturated                   | 2.37 | 19.7 | -    | -     | 17.58 | -    |
| 28 | 15:0 2OH                                      | long chain saturated                      | 0.64 | 0.24 | -    | -     | 0.42  | -    |
| 29 | 15:0 3OH                                      | long chain saturated                      | 1.22 | -    | -    | -     | -     | -    |
| 30 | 14-Methylhexadecanoic acid(17:0 anteiso)      | Methyl Branched Saturated                 | 0.64 | 0.17 | -    | -     | 0.48  | -    |
| 31 | 18:1 iso H                                    | long chain saturated                      | 1.39 | 0.33 | -    | -     | 0.79  | -    |
| 32 | 16:0 3OH                                      | long chain saturated                      | 1.20 | 0.28 | -    | -     | 0.72  | --   |
| 33 | 16-Methylheptadecanoic acid(18:0 iso)         | Methyl branched                           | 0.72 | 0.20 | -    | -     | 0.35  | 0.65 |
| 34 | (9Z,12Z)-9,12-Octadecadienoic acid (18:2 w6c) | Polyunsaturated Omega- 6                  | 36.3 | 13.4 | -    | -     | -     | 5.76 |
| 35 | 17:0 iso 3OH                                  | long chain saturated                      | 1.46 | 0.53 | -    | -     | 1.42  | -    |
| 36 | (10Z)-10-Nonadecenoic acid (19:1 w9c)         | Long chain saturated                      | 2.07 | -    | -    | -     | -     | 2.16 |
| 37 | (12Z)-12-Nonadecenoic acid (19:1 w7c)         | Long chain saturated                      | 0.76 | 0.12 | -    | -     | 0.43  | -    |
| 38 | (11Z,14Z)-11,14-Icosadienoic acid(20:2 w6,9c) | Polyunsaturated                           | 2.65 | -    | -    | -     | -     | -    |
| 39 | 14:0 3OH                                      | Long chain saturated                      | 0.66 | -    | -    | -     | 0.43  | -    |
| 40 | (11Z)-11-Octadecenoic acid (18:1 w7c)         | omega-7unsaturarted                       | -    | 2.19 | -    | -     | 3.57  | 0.94 |
| 41 | Undecanoic acid(11:0)                         | Medium chain saturated                    | -    | 0.69 | -    | -     | -     | 2.15 |
| 42 | 3-Hydroxydecanoic acid(10:0 3OH)              | Medium chain saturated                    | -    | 0.30 | -    | -     | -     | -    |
| 43 | 9-Methylundecanoic acid(12:0 anteiso)         | Methyl Branched Saturated                 | -    | 0.18 | -    | -     | 0.28  | 1.11 |
| 44 | 11:0 2OH                                      | Medium chain saturated                    | -    | 0.23 | -    | -     | -     | 1.15 |
| 45 | 11-Methyldodecanoic acid(13:0 iso)            | Methyl Branched Saturated                 | -    | 0.13 | -    | -     | -     | -    |
| 46 | 1-Hexadecanol(16:0 N alcohol)                 | Long chain Fatty alcohol                  | -    | 0.08 | -    | -     | -     | -    |
| 47 | 15:0 iso 3OH                                  | long chain saturated                      | -    | 0.22 | -    | -     | -     | 1.08 |
| 48 | 17:0 2OH                                      | Long chain saturated                      | -    | 0.09 | -    | -     | -     | -    |
| 49 | 18:0 2OH                                      | Long chain saturated                      | -    | 0.80 | -    | -     | 0.61  | -    |
| 50 | Tridecanoic acid(13:0)                        | Long chain Saturated                      | -    | -    | 0.42 | -     | 0.29  | -    |
| 51 | Unidentified                                  | ---                                       | -    | -    | 18.9 | 22.00 | -     | -    |
| 52 | Unidentified                                  | ---                                       | -    | -    | 0    | 1.28  | 1.13  | -    |
| 53 | Unidentified                                  | ---                                       | -    | -    | 1.13 | -     | -     | -    |
| 54 | (9Z)-9-Heptadecenoic acid(17:1 w8c)           | Long chain saturated                      | -    | -    | 1.22 | 2.25  | -     | -    |
| 55 | Unidentified                                  | ---                                       | -    | -    | 20.7 | 15.71 | -     | -    |

|    |                                                          |                           |    |   |       |       |      |      |
|----|----------------------------------------------------------|---------------------------|----|---|-------|-------|------|------|
| 56 | Unidentified                                             | ---                       | -  | - | 3.50  | 2.43  | -    | -    |
| 57 | Unidentified                                             | ---                       | -  | - | 0.32  | -     | -    | -    |
| 58 | Unidentified                                             | ---                       | -  | - | 0.17  | 0.34  | -    | -    |
| 58 | Unidentified                                             | ---                       | -  | - | 1.12  | 0.64  | -    | -    |
| 59 | (5Z,8Z,11Z,14Z)-5,8,11,14-Icosatetraenoic acid(20:4 w6c) | Polyunsaturated           | -- | - | 0.43  | -     | -    | -    |
| 60 | Unidentified                                             | ---                       | -  | - | 20.18 | 23.13 | -    | -    |
| 61 | Unidentified                                             | ---                       | -  | - | 20.75 | 20.75 | -    | -    |
| 62 | Unidentified                                             | ---                       | -  | - | 3.82  | 2.43  | -    | -    |
| 63 | Unidentified                                             | ---                       | -  | - | 0.36  | -     | -    | -    |
| 64 | 11-Methyltridecanoic acid(14:0 anteiso)                  | Long chain Saturated      | -  | - | -     | 0.18  | -    | 1.24 |
| 65 | (9Z)-9-Pentadecenoic acid(15:1 w6c)                      | Long chain Saturated      | -  | - | -     | 0.28  | -    | 1.32 |
| 66 | Unidentified                                             | ---                       | -  | - | -     | 0.12  | -    | -    |
| 67 | Unidentified                                             | ---                       | -  | - | -     | 0.14  | -    | -    |
| 68 | (7Z)-13-Methyl-7-Hexadecenoic acid(17:1 anteiso w9c)     | Long chain Saturated      | -  | - | -     | 0.11  | 0.56 | 1.86 |
| 69 | (11Z)-11-Heptadecenoic acid(17:1 w6c)                    | Long chain Saturated      | -  | - | -     | 0.05  | 0.31 | -    |
| 70 | (12Z)-12-Heptadecenoic acid(17:1 w5c)                    | Long chain Saturated      | -  | - | -     | 0.06  | -    | 1.69 |
| 71 | Unidentified                                             | ---                       | -  | - | -     | 0.16  | -    | -    |
| 72 | Nonadecanoic(19:0)                                       | Long chain saturated      | -  | - | -     | 0.11  | -    | 1.05 |
| 73 | (11Z)-11-Icosenoic acid(20:1 w9c)                        | Monounsaturated Omega-9   | -  | - | -     | 0.29  | -    | -    |
| 74 | Unidentified                                             | ---                       | -  | - | -     | 0.22  | -    | -    |
| 75 | 10:0 iso                                                 | Medium chain saturated    | -  | - | -     | -     | 0.51 | -    |
| 76 | 12:1 3OH                                                 | Medium chain saturated    | -  | - | -     | -     | 0.28 | -    |
| 77 | 15:1 iso F                                               | Long chain saturated      | -  | - | -     | -     | 0.70 | -    |
| 78 | 13:0 3OH                                                 | Medium chain saturated    | -  | - | -     | -     | 0.65 | -    |
| 79 | (11Z)-11-Hexadecenoic acid(16:1 w5c)                     | Long chain saturated      | -  | - | -     | -     | 0.29 | -    |
| 80 | 10-Methyloctadecanoic acid(18:0 10-methyl, TBSA)         | Methyl branched saturated | -  | - | -     | -     | 1.14 | -    |
| 81 | 12:1 at 11-12                                            | Medium chain saturated    | -  | - | -     | -     | -    | 1.02 |
| 82 | 3-Hydroxy-9-Methyldecanoic acid(11:0 iso 3OH)            | Branched chain hydroxyl   | -  | - | -     | -     | -    | 1.31 |
| 83 | 14:1 iso E                                               | Long chain saturated      | -  | - | -     | -     | -    | 1.51 |
| 84 | 15:1 iso G                                               | Long chain saturated      | -  | - | -     | -     | -    | 1.06 |
| 85 | 15-Methylhexadecanoic acid(17:0 iso)                     | Methyl Branched Saturated | -  | - | -     | -     | -    | 1.64 |
| 86 | 16:1 2OH                                                 | Long chain saturated      | -  | - | -     | -     | -    | 0.69 |
| 87 | 16:0 iso 3OH                                             | Long chain saturated      | -  | - | -     | -     | -    | 1.63 |

|    |                                                                  |                      |   |   |   |   |   |      |
|----|------------------------------------------------------------------|----------------------|---|---|---|---|---|------|
| 88 | 19:0 cyclo w8c                                                   | Long chain saturated | - | - | - | - | - | 2.04 |
| 89 | (5Z,8Z,11Z,14Z)-5,8,11,14-Icosatetraenoic acid(20:4 w6,9,12,15c) | Polyunsaturated      | - | - | - | - | - | 0.73 |
| 90 | (11Z,14Z)-11,14-Icosadienoic acid(20:2 w6,9c)                    | Polyunsaturated      | - | - | - | - | - | 1.20 |
